# Supplementary material for: Mid-regional pro-adrenomedullin (MR-proADM) and mid-regional pro-atrial natriuretic peptide (MR-proANP) in severe aortic valve stenosis: association with outcome after transcatheter aortic valve implantation (TAVI)
Source: publisher site journal article supplement (doi:10.1515/cclm-2015-0419), 2016-08-15
Supplement: Supplementary file 2 [file cclm-2015-0419_suppl.docx]

**Supplementary Material: DOI:**[**10.1515/cclm-2016-0419**](http://dx.doi.org/10.1515/cclm-2014-0090)

**Supplememtary Table 1 Multivariate stepwise Cox regression analysis for 1-year cardiovascular Events and all cause mortality depending on preinterventional biomarker levels.**

|  | **Cardiovascular events** | | **All cause mortality** | |
| --- | --- | --- | --- | --- |
| **Multivariate Model Including Age** |  |  |  |  |
| MR-proADM | 2.60 (1.07–6.31) | 0.035 | 3.35 (1.08–10.39) | 0.036 |
| MR-proANP | 2.49 (1.02–6.07) | 0.045 | 4.70 (1.34–16.54) | 0.016 |
| NT-proBNP | 3.14 (1.23–7.99) | 0.016 | 4.71 (1.34–16.58) | 0.016 |
| MR-proADM + Troponin + CRP | 1.06 (0.99-1.13) | 0.108 | 5.41 (2.01-14.58) | 0.010 |
| MR-proANP + Troponin + CRP | 4.94 (1.41-17.33) | 0.013 | 5.41 (2.01-14.58) | 0.010 |
| NT-proBNP + Troponin + CRP | 4.94 (1.41-17.33) | 0.013 | 5.41 (2.01-14.58) | 0.010 |
| MR-proADM+MR-proANP+NT-proBNP | 3.64 (1.57–8.44) | 0.003 | 6.79 (2.18–21.11) | 0.001 |
| **Multivariate Model Including Gender** |  |  |  |  |
| MR-proADM | 2.51 (1.03–6.13) | 0.042 | 3.26 (1.05–10.12) | 0.041 |
| MR-proANP | 2.50 (1.03–6.10) | 0.044 | 4.81 (1.37–16.91) | 0.014 |
| NT-proBNP | 3.09 (1.21–7.91) | 0.018 | 4.75 (1.35–16.76) | 0.015 |
| MR-proADM + Troponin + CRP | 4.18 (1.35-12.97) | 0.013 | 5.41 (2.01-14.58) | 0.010 |
| MR-proANP + Troponin + CRP | 4.94 (1.41-17.33) | 0.013 | 5.41 (2.01-14.58) | 0.010 |
| NT-proBNP + Troponin + CRP | 4.94 (1.41-17.33) | 0.013 | 5.41 (2.01-14.58) | 0.010 |
| MR-proADM+MR-proANP+NT-proBNP | 3.55 (1.51–8.33) | 0.004 | 6.80 (2.16–21.37) | 0.001 |
| **Multivariate Model Including Impaired Renal Functiona** |  |  |  |  |
| MR-proADM | 2.91 (1.12-7.59) | 0.029 | 3.97 (1.20–13.14) | 0.024 |
| MR-proANP | 2.98 (1.13-7.82) | 0.027 | 6.23 (1.67–23.15) | 0.006 |
| NT-proBNP | 3.32 (1.29-8.55) | 0.013 | 5.14 (1.45–18.28) | 0.011 |
| MR-proADM + Troponin + CRP | 4.18 (1.35-12.97) | 0.013 | 5.41 (2.01-14.58) | 0.010 |
| MR-proANP + Troponin + CRP | 4.94 (1.41-17.33) | 0.013 | 5.41 (2.01-14.58) | 0.010 |
| NT-proBNP + Troponin + CRP | 4.94 (1.41-17.33) | 0.013 | 5.41 (2.01-14.58) | 0.010 |
| MR-proADM+MR-proANP+NT-proBNP | 4.42 (1.78-10.99) | 0.001 | 8.99 (2.74–29.47) | < 0.001 |

aImpaired renal function is defined as glomerular filtration rate (GFR) <60 mL/min. Patients undergoing dialysis were included in this model. HR, hazard ratio; C, confidence interval. HRs are calculated for patients with a biomarker level above versus those with a level below the median.
